# Supplementary material for: Single-step aerosol-based synthesis of nanostructured thin films for hydrogen sensing
Source: Royal Society of Chemistry journal article supplement (doi:10.1039/d4na00884g), 2025-01-01
Supplement: d4na00884g1.pdf [file d4na00884g1.pdf]

## Supplementary information

### Single-step Aerosol-based Synthesis of Nanostructured Thin Films for Hydrogen Sensing

Klito C. Petallidou,<sup>a</sup> Peter Kováčik,<sup>b</sup> Andreas Schmidt-Ott<sup>\*a,c,d</sup> and George Biskos<sup>\*a,e</sup>

<sup>a</sup>Climate and Atmosphere Research Centre, The Cyprus Institute, 2121 Nicosia, Cyprus,

<sup>b</sup>National Research Council of Canada, K1A 0R6, Ottawa, Canada,

<sup>c</sup>Faculty of Applied Sciences, Delft University of Technology, 2629 HZ Delft, The Netherlands,

<sup>d</sup>VSPARTICLE B.V, 2629 JD Delft, The Netherlands

<sup>e</sup>Faculty of Civil Engineering and Geosciences, Delft University of Technology, 2628 CN Delft, The Netherlands

Email: [a.schmidt-ott@tudelft.nl](mailto:a.schmidt-ott@tudelft.nl) (Andreas Schmidt-Ott); or

[g.biskos@cyi.ac.cy](mailto:g.biskos@cyi.ac.cy); [g.biskos@tudelft.nl](mailto:g.biskos@tudelft.nl) (George Biskos)

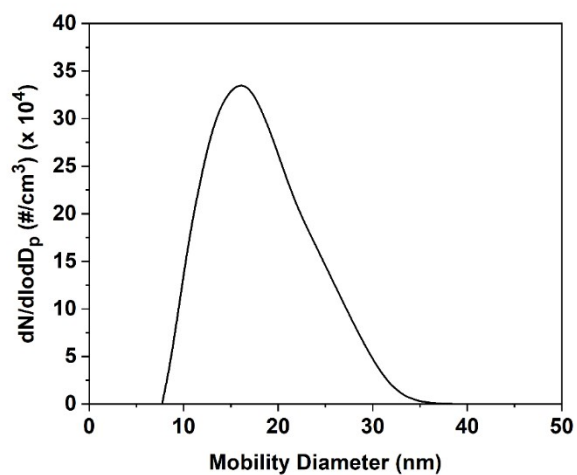

**Figure S1.** Size distribution of the Pd NPs produced by the glowing wire generator as those were measured by a Scanning Mobility Particle Sizer.
